# Supplementary material for: Identification and Functional Characterization of ZmSCYL2 Involved in Phytosterol Accumulation in Plants
Source: MDPI journal article supplement (doi:10.3390/ijms241210411), 2023-06-20
Supplement: s1 [file s1]

**Table S1.** Statistic of phytosterol contents in 244 maize inbred lines

| No. | Name     | Campesterol       |       | Stigmasterol      |       | $\beta$ -Sitosterol |       |
|-----|----------|-------------------|-------|-------------------|-------|---------------------|-------|
|     |          | Content<br>(mg/g) | SD    | Content<br>(mg/g) | SD    | Content<br>(mg/g)   | SD    |
| 1.  | 384-2    | 1.814             | 0.009 | 0.259             | 0.002 | 11.649              | 0.024 |
| 2   | CML326   | 1.227             | 0.005 | 0.227             | 0.001 | 10.961              | 0.017 |
| 3   | Ji63     | 2.888             | 0.012 | 0.207             | 0.002 | 9.007               | 0.078 |
| 4   | CIMBL131 | 1.199             | 0.028 | 3.107             | 0.010 | 7.758               | 0.127 |
| 5   | IRF314   | 1.870             | 0.002 | 0.520             | 0.001 | 9.164               | 0.010 |
| 6   | CIMBL45  | 2.314             | 0.003 | 0.524             | 0.001 | 8.660               | 0.019 |
| 7   | CIMBL99  | 1.691             | 0.014 | 0.258             | 0.006 | 9.395               | 0.047 |
| 8   | CIMBL104 | 2.781             | 0.005 | 0.384             | 0.001 | 7.861               | 0.014 |
| 9   | CML307   | 1.275             | 0.003 | 0.801             | 0.001 | 8.878               | 0.019 |
| 10  | By804    | 2.239             | 0.006 | 0.304             | 0.003 | 8.204               | 0.024 |
| 11  | CIMBL58  | 1.619             | 0.014 | 0.470             | 0.004 | 8.323               | 0.045 |
| 12  | CIMBL48  | 1.887             | 0.003 | 0.475             | 0.001 | 7.990               | 0.032 |
| 13  | CIMBL96  | 2.634             | 0.007 | 0.537             | 0.003 | 7.023               | 0.048 |
| 14  | CIMBL124 | 2.006             | 0.005 | 0.401             | 0.002 | 7.787               | 0.016 |
| 15  | 04K5686  | 2.007             | 0.001 | 0.431             | 0.002 | 7.435               | 0.005 |
| 16  | CIMBL120 | 2.228             | 0.004 | 0.641             | 0.002 | 6.929               | 0.033 |
| 17  | 5213     | 1.437             | 0.006 | 0.429             | 0.002 | 7.872               | 0.020 |
| 18  | CIMBL74  | 2.756             | 0.005 | 0.285             | 0.002 | 6.611               | 0.030 |
| 19  | CIMBL154 | 1.768             | 0.001 | 0.547             | 0.006 | 7.237               | 0.009 |
| 20  | Yan414   | 1.383             | 0.005 | 0.408             | 0.003 | 7.756               | 0.038 |
| 21  | CIMBL86  | 1.816             | 0.001 | 0.452             | 0.002 | 7.028               | 0.000 |
| 22  | 9642     | 1.796             | 0.005 | 0.331             | 0.003 | 6.975               | 0.022 |
| 23  | MO113    | 0.890             | 0.001 | 0.270             | 0.001 | 7.915               | 0.014 |
| 24  | CML20    | 1.683             | 0.001 | 0.639             | 0.002 | 6.581               | 0.015 |
| 25  | CIMBL17  | 1.244             | 0.008 | 0.164             | 0.002 | 7.480               | 0.022 |
| 26  | CML223   | 1.700             | 0.003 | 0.500             | 0.001 | 6.606               | 0.006 |
| 27  | CIMBL156 | 1.946             | 0.004 | 0.287             | 0.001 | 6.511               | 0.020 |
| 28  | Ji853    | 2.107             | 0.002 | 0.205             | 0.001 | 6.425               | 0.015 |
| 29  | BT1      | 1.003             | 0.016 | 0.161             | 0.004 | 7.562               | 0.049 |
| 30  | Dan3130  | 0.715             | 0.001 | 0.266             | 0.001 | 7.675               | 0.008 |

|    |          |       |       |       |       |       |       |
|----|----------|-------|-------|-------|-------|-------|-------|
| 31 | 5237     | 1.756 | 0.008 | 0.508 | 0.004 | 6.348 | 0.023 |
| 32 | CIMBL43  | 1.395 | 0.000 | 0.728 | 0.000 | 6.456 | 0.007 |
| 33 | CIMBL49  | 2.239 | 0.001 | 0.399 | 0.001 | 5.897 | 0.008 |
| 34 | CML32    | 1.871 | 0.016 | 0.544 | 0.005 | 5.991 | 0.076 |
| 35 | By4839   | 1.375 | 0.003 | 0.383 | 0.001 | 6.579 | 0.010 |
| 36 | TT16     | 1.299 | 0.006 | 0.455 | 0.001 | 6.521 | 0.024 |
| 37 | CIMBL6   | 1.448 | 0.006 | 0.525 | 0.001 | 6.228 | 0.021 |
| 38 | By815    | 2.142 | 0.005 | 0.362 | 0.001 | 5.674 | 0.040 |
| 39 | CML470   | 1.246 | 0.002 | 0.427 | 0.000 | 6.439 | 0.012 |
| 40 | Zheng29  | 1.474 | 0.004 | 0.190 | 0.002 | 6.319 | 0.019 |
| 41 | CML327   | 1.628 | 0.004 | 0.282 | 0.002 | 5.993 | 0.016 |
| 42 | CIMBL122 | 1.648 | 0.003 | 0.335 | 0.002 | 5.905 | 0.013 |
| 43 | IRF291   | 1.266 | 0.003 | 0.365 | 0.001 | 6.216 | 0.011 |
| 44 | Shen137  | 1.220 | 0.009 | 0.444 | 0.004 | 6.159 | 0.034 |
| 45 | B111     | 1.547 | 0.005 | 0.424 | 0.003 | 5.837 | 0.016 |
| 46 | CML432   | 1.276 | 0.006 | 0.730 | 0.002 | 5.801 | 0.028 |
| 47 | M153     | 0.920 | 0.012 | 0.286 | 0.003 | 7.125 | 0.037 |
| 48 | CML364   | 1.483 | 0.003 | 0.231 | 0.002 | 5.991 | 0.014 |
| 49 | GEMS16   | 1.362 | 0.002 | 0.393 | 0.001 | 5.931 | 0.005 |
| 50 | CML166   | 1.401 | 0.012 | 0.350 | 0.008 | 5.777 | 0.078 |
| 51 | CIMBL133 | 0.747 | 0.005 | 0.214 | 0.002 | 6.492 | 0.017 |
| 52 | CIMBL65  | 1.089 | 0.004 | 0.742 | 0.001 | 5.622 | 0.006 |
| 53 | Zheng30  | 1.381 | 0.014 | 0.165 | 0.004 | 5.886 | 0.100 |
| 54 | CML473   | 1.195 | 0.003 | 0.450 | 0.000 | 5.781 | 0.006 |
| 55 | 150      | 0.992 | 0.002 | 0.265 | 0.001 | 6.110 | 0.003 |
| 56 | CIMBL90  | 1.525 | 0.005 | 0.355 | 0.003 | 5.474 | 0.007 |
| 57 | CML285   | 0.792 | 0.002 | 0.154 | 0.002 | 6.370 | 0.006 |
| 58 | CML192   | 1.107 | 0.003 | 0.518 | 0.001 | 5.644 | 0.007 |
| 59 | TY8      | 1.451 | 0.001 | 0.326 | 0.002 | 5.447 | 0.004 |
| 60 | CIMBL121 | 0.889 | 0.004 | 0.719 | 0.000 | 5.607 | 0.014 |
| 61 | 1462     | 1.034 | 0.014 | 0.282 | 0.003 | 5.889 | 0.053 |
| 62 | CML465   | 0.841 | 0.003 | 0.197 | 0.001 | 6.113 | 0.005 |
| 63 | CML170   | 1.133 | 0.004 | 0.399 | 0.001 | 5.579 | 0.012 |
| 64 | R08      | 1.162 | 0.005 | 0.262 | 0.001 | 5.678 | 0.013 |

|    |          |       |       |       |       |       |       |
|----|----------|-------|-------|-------|-------|-------|-------|
| 65 | CML479   | 1.293 | 0.002 | 0.354 | 0.002 | 5.438 | 0.032 |
| 66 | CIMBL125 | 1.216 | 0.003 | 0.288 | 0.001 | 5.544 | 0.011 |
| 67 | CML172   | 1.401 | 0.002 | 0.274 | 0.001 | 5.295 | 0.009 |
| 68 | GY386B   | 0.950 | 0.001 | 0.093 | 0.003 | 5.904 | 0.004 |
| 69 | CIMBL52  | 1.398 | 0.002 | 0.458 | 0.001 | 5.064 | 0.010 |
| 70 | CIMBL51  | 1.325 | 0.004 | 0.543 | 0.002 | 5.018 | 0.018 |
| 71 | CML471   | 1.120 | 0.001 | 0.291 | 0.000 | 5.463 | 0.003 |
| 72 | Sy1077   | 1.103 | 0.006 | 0.428 | 0.001 | 5.296 | 0.028 |
| 73 | Qi205    | 1.279 | 0.003 | 0.315 | 0.001 | 5.145 | 0.018 |
| 74 | CML433   | 1.061 | 0.003 | 0.400 | 0.001 | 5.270 | 0.016 |
| 75 | LY042    | 0.751 | 0.002 | 0.537 | 0.001 | 5.405 | 0.009 |
| 76 | CIMBL34  | 1.441 | 0.003 | 0.503 | 0.002 | 4.700 | 0.014 |
| 77 | CIMBL18  | 0.782 | 0.028 | 0.183 | 0.003 | 5.593 | 0.010 |
| 78 | Dong46   | 1.772 | 0.006 | 0.399 | 0.003 | 4.286 | 0.025 |
| 79 | CIMBL32  | 1.451 | 0.005 | 0.300 | 0.001 | 4.655 | 0.032 |
| 80 | CIMBL33  | 1.193 | 0.003 | 0.318 | 0.001 | 4.836 | 0.011 |
| 81 | CML118   | 1.714 | 0.006 | 0.273 | 0.000 | 4.288 | 0.021 |
| 82 | CIMBL102 | 0.936 | 0.010 | 0.333 | 0.002 | 4.996 | 0.037 |
| 83 | W138     | 1.599 | 0.004 | 0.432 | 0.002 | 4.234 | 0.015 |
| 84 | Lv28     | 1.142 | 0.002 | 0.546 | 0.001 | 4.569 | 0.004 |
| 85 | CIMBL63  | 1.248 | 0.002 | 0.434 | 0.001 | 4.538 | 0.012 |
| 86 | Dan4245  | 0.711 | 0.003 | 0.213 | 0.001 | 5.247 | 0.010 |
| 87 | 835a     | 0.777 | 0.003 | 0.206 | 0.001 | 5.132 | 0.003 |
| 88 | CIMBL82  | 1.361 | 0.002 | 0.365 | 0.000 | 4.367 | 0.008 |
| 89 | Lx9801   | 1.252 | 0.008 | 0.420 | 0.002 | 4.341 | 0.039 |
| 90 | CIMBL56  | 0.803 | 0.002 | 0.227 | 0.000 | 4.962 | 0.007 |
| 91 | CML29    | 1.253 | 0.003 | 0.415 | 0.105 | 4.308 | 0.017 |
| 92 | CIMBL30  | 1.283 | 0.008 | 0.353 | 0.003 | 4.320 | 0.034 |
| 93 | TY5      | 1.275 | 0.008 | 0.252 | 0.003 | 4.429 | 0.025 |
| 94 | CIMBL146 | 0.620 | 0.000 | 0.377 | 0.001 | 4.923 | 0.009 |
| 95 | CML27    | 0.988 | 0.003 | 0.425 | 0.002 | 4.473 | 0.013 |
| 96 | CIMBL53  | 1.035 | 0.003 | 0.742 | 0.001 | 4.077 | 0.025 |
| 97 | P178     | 1.044 | 0.005 | 0.303 | 0.000 | 4.501 | 0.005 |
| 98 | TY7      | 1.239 | 0.005 | 0.242 | 0.005 | 4.356 | 0.024 |

|     |          |       |       |       |       |       |       |
|-----|----------|-------|-------|-------|-------|-------|-------|
| 99  | CIMBL107 | 1.074 | 0.006 | 0.389 | 0.001 | 4.359 | 0.028 |
| 100 | DE.EX    | 0.957 | 0.008 | 0.236 | 0.001 | 4.623 | 0.017 |
| 101 | CIMBL150 | 1.126 | 0.003 | 0.271 | 0.001 | 4.281 | 0.009 |
| 102 | CIMBL23  | 0.767 | 0.009 | 0.222 | 0.003 | 4.682 | 0.022 |
| 103 | CML287   | 0.745 | 0.003 | 0.218 | 0.003 | 4.706 | 0.011 |
| 104 | CIMBL83  | 0.908 | 0.009 | 0.164 | 0.003 | 4.559 | 0.025 |
| 105 | CML324   | 0.800 | 0.004 | 0.260 | 0.002 | 4.540 | 0.038 |
| 106 | 647      | 1.084 | 0.005 | 0.281 | 0.000 | 4.215 | 0.017 |
| 107 | Zheng653 | 1.293 | 0.002 | 0.367 | 0.000 | 3.908 | 0.011 |
| 108 | GEMS37   | 1.059 | 0.001 | 0.397 | 0.001 | 4.080 | 0.015 |
| 109 | CML361   | 0.920 | 0.002 | 0.205 | 0.001 | 4.384 | 0.013 |
| 110 | Dan599   | 0.741 | 0.003 | 0.142 | 0.001 | 4.547 | 0.007 |
| 111 | 9782     | 0.659 | 0.003 | 0.419 | 0.001 | 4.298 | 0.017 |
| 112 | CIMBL47  | 1.032 | 0.001 | 0.171 | 0.001 | 4.085 | 0.011 |
| 113 | CML226   | 0.875 | 0.011 | 0.359 | 0.005 | 4.037 | 0.033 |
| 114 | CML290   | 0.436 | 0.003 | 0.254 | 0.002 | 4.581 | 0.007 |
| 115 | CIMBL153 | 1.174 | 0.002 | 0.337 | 0.002 | 3.751 | 0.010 |
| 116 | CIMBL129 | 0.599 | 0.004 | 0.125 | 0.004 | 4.513 | 0.023 |
| 117 | LXN      | 0.483 | 0.004 | 0.110 | 0.002 | 4.493 | 0.012 |
| 118 | CIMBL100 | 0.999 | 0.003 | 0.466 | 0.002 | 3.598 | 0.014 |
| 119 | CIMBL16  | 0.929 | 0.004 | 0.345 | 0.002 | 3.754 | 0.012 |
| 120 | HTH-17   | 0.771 | 0.002 | 0.650 | 0.001 | 3.602 | 0.007 |
| 121 | CIMBL138 | 0.672 | 0.002 | 0.807 | 0.002 | 3.535 | 0.011 |
| 122 | 975-12   | 0.768 | 0.001 | 0.265 | 0.000 | 3.823 | 0.006 |
| 123 | GEMS2    | 0.807 | 0.001 | 0.188 | 0.002 | 3.855 | 0.006 |
| 124 | CML423   | 0.941 | 0.009 | 0.285 | 0.002 | 3.587 | 0.034 |
| 125 | Ry697    | 0.897 | 0.001 | 0.213 | 0.001 | 3.696 | 0.006 |
| 126 | CIMBL78  | 0.701 | 0.004 | 0.161 | 0.002 | 3.906 | 0.014 |
| 127 | Liao138  | 0.837 | 0.007 | 0.331 | 0.003 | 3.923 | 0.026 |
| 128 | CML422   | 0.872 | 0.001 | 0.133 | 0.008 | 3.691 | 0.004 |
| 129 | CIMBL136 | 1.127 | 0.002 | 0.267 | 0.001 | 3.278 | 0.006 |
| 130 | CIMBL73  | 0.523 | 0.003 | 0.201 | 0.006 | 3.905 | 0.032 |
| 131 | CIMBL95  | 0.875 | 0.005 | 0.231 | 0.006 | 3.447 | 0.025 |
| 132 | 832      | 0.873 | 0.006 | 0.269 | 0.003 | 3.406 | 0.050 |

|     |          |       |       |       |       |       |       |
|-----|----------|-------|-------|-------|-------|-------|-------|
| 133 | CML298   | 0.852 | 0.004 | 0.159 | 0.002 | 3.535 | 0.015 |
| 134 | CIMBL88  | 0.942 | 0.010 | 0.135 | 0.003 | 3.465 | 0.045 |
| 135 | CIMBL9   | 0.727 | 0.003 | 0.400 | 0.002 | 3.358 | 0.016 |
| 136 | CY72     | 0.867 | 0.010 | 0.296 | 0.002 | 3.277 | 0.048 |
| 137 | 04K5702  | 0.972 | 0.008 | 0.304 | 0.004 | 2.836 | 0.028 |
| 138 | CIMBL93  | 0.593 | 0.005 | 0.253 | 0.001 | 3.231 | 0.010 |
| 139 | CIMBL13  | 0.817 | 0.003 | 0.264 | 0.001 | 2.905 | 0.009 |
| 140 | CIMBL91  | 0.567 | 0.002 | 0.163 | 0.000 | 3.060 | 0.006 |
| 141 | CML139   | 0.539 | 0.001 | 0.300 | 0.001 | 2.931 | 0.003 |
| 142 | CIMBL142 | 0.726 | 0.001 | 0.124 | 0.001 | 2.908 | 0.001 |
| 143 | CML468   | 0.469 | 0.001 | 0.183 | 0.001 | 2.962 | 0.006 |
| 144 | CML411   | 0.400 | 0.010 | 0.273 | 0.002 | 2.888 | 0.059 |
| 145 | Gy237    | 0.450 | 0.002 | 0.147 | 0.001 | 2.956 | 0.005 |
| 146 | B11      | 0.366 | 0.000 | 0.282 | 0.001 | 2.898 | 0.000 |
| 147 | CML191   | 0.753 | 0.002 | 0.211 | 0.002 | 2.567 | 0.015 |
| 148 | CIMBL76  | 0.773 | 0.004 | 0.359 | 0.002 | 2.393 | 0.058 |
| 149 | Zong31   | 0.581 | 0.004 | 0.171 | 0.001 | 2.769 | 0.013 |
| 150 | CML360   | 0.377 | 0.002 | 0.231 | 0.001 | 2.894 | 0.007 |
| 151 | Liao159  | 0.602 | 0.003 | 0.107 | 0.002 | 2.573 | 0.012 |
| 152 | CIMBL42  | 0.551 | 0.000 | 0.135 | 0.001 | 2.532 | 0.005 |
| 153 | CIMBL11  | 0.447 | 0.003 | 0.170 | 0.001 | 2.414 | 0.019 |
| 154 | CIMBL106 | 0.521 | 0.004 | 0.184 | 0.002 | 2.296 | 0.026 |
| 155 | CIMBL89  | 0.174 | 0.005 | 0.128 | 0.002 | 2.646 | 0.018 |
| 156 | CIMBL38  | 0.290 | 0.013 | 0.225 | 0.002 | 2.166 | 0.072 |
| 157 | CML454   | 0.256 | 0.002 | 0.175 | 0.001 | 2.214 | 0.007 |
| 158 | CIMBL75  | 0.360 | 0.001 | 0.159 | 0.002 | 2.092 | 0.012 |
| 159 | CML51    | 0.195 | 0.002 | 0.152 | 0.001 | 2.216 | 0.013 |
| 160 | CML426   | 0.377 | 0.001 | 0.077 | 0.002 | 2.029 | 0.010 |
| 161 | CIMBL105 | 0.255 | 0.001 | 0.225 | 0.001 | 1.983 | 0.004 |
| 162 | CML496   | 0.446 | 0.000 | 0.219 | 0.001 | 1.759 | 0.009 |
| 163 | CIMBL128 | 0.187 | 0.004 | 0.051 | 0.001 | 2.176 | 0.012 |
| 164 | SW1611   | 0.299 | 0.001 | 0.171 | 0.003 | 1.927 | 0.029 |
| 165 | CML451   | 0.251 | 0.002 | 0.161 | 0.003 | 1.960 | 0.013 |
| 166 | CIMBL22  | 0.195 | 0.003 | 0.091 | 0.001 | 2.070 | 0.020 |

|     |          |       |       |       |       |       |       |
|-----|----------|-------|-------|-------|-------|-------|-------|
| 167 | CML134   | 0.373 | 0.004 | 0.213 | 0.003 | 1.707 | 0.018 |
| 168 | CIMBL71  | 0.180 | 0.003 | 0.120 | 0.003 | 1.977 | 0.019 |
| 169 | CML114   | 0.412 | 0.003 | 0.163 | 0.002 | 1.599 | 0.014 |
| 170 | CML493   | 0.182 | 0.001 | 0.094 | 0.001 | 1.848 | 0.045 |
| 171 | Nan21-3  | 0.263 | 0.004 | 0.092 | 0.003 | 1.769 | 0.026 |
| 172 | CML115   | 0.322 | 0.000 | 0.165 | 0.001 | 1.602 | 0.009 |
| 173 | CIMBL36  | 0.274 | 0.001 | 0.194 | 0.000 | 1.580 | 0.035 |
| 174 | CIMBL14  | 0.345 | 0.015 | 0.084 | 0.002 | 1.609 | 0.058 |
| 175 | Qi319    | 0.131 | 0.009 | 0.079 | 0.005 | 1.784 | 0.043 |
| 176 | CIMBL143 | 0.268 | 0.004 | 0.080 | 0.002 | 1.633 | 0.024 |
| 177 | CML40    | 0.368 | 0.002 | 0.167 | 0.002 | 1.441 | 0.030 |
| 178 | CIMBL27  | 0.246 | 0.015 | 0.167 | 0.008 | 1.522 | 0.027 |
| 179 | CML323   | 0.175 | 0.043 | 0.158 | 0.012 | 1.572 | 0.100 |
| 180 | CML486   | 0.258 | 0.002 | 0.211 | 0.000 | 1.394 | 0.005 |
| 181 | CML286   | 0.096 | 0.005 | 0.185 | 0.002 | 1.582 | 0.023 |
| 182 | CIMBL67  | 0.167 | 0.005 | 0.093 | 0.003 | 1.596 | 0.039 |
| 183 | CML325   | 0.217 | 0.010 | 0.133 | 0.004 | 1.486 | 0.048 |
| 184 | CIMBL35  | 0.295 | 0.001 | 0.119 | 0.000 | 1.400 | 0.005 |
| 185 | CIMBL110 | 0.289 | 0.001 | 0.094 | 0.005 | 1.426 | 0.007 |
| 186 | CIMBL60  | 0.289 | 0.002 | 0.181 | 0.001 | 1.335 | 0.004 |
| 187 | CIMBL54  | 0.231 | 0.007 | 0.123 | 0.007 | 1.426 | 0.033 |
| 188 | CML31    | 0.215 | 0.002 | 0.129 | 0.002 | 1.409 | 0.008 |
| 189 | CML26    | 0.340 | 0.002 | 0.251 | 0.002 | 1.148 | 0.019 |
| 190 | CIMBL117 | 0.207 | 0.002 | 0.195 | 0.001 | 1.309 | 0.007 |
| 191 | CML69    | 0.101 | 0.002 | 0.091 | 0.001 | 1.517 | 0.007 |
| 192 | CIMBL40  | 0.217 | 0.002 | 0.176 | 0.002 | 1.249 | 0.035 |
| 193 | CIMBL25  | 0.323 | 0.003 | 0.172 | 0.003 | 1.132 | 0.024 |
| 194 | CML289   | 0.110 | 0.005 | 0.144 | 0.005 | 1.352 | 0.046 |
| 195 | CIMBL87  | 0.428 | 0.002 | 0.060 | 0.002 | 1.095 | 0.007 |
| 196 | CIMBL2   | 0.222 | 0.001 | 0.167 | 0.000 | 1.185 | 0.006 |
| 197 | CIMBL139 | 0.260 | 0.002 | 0.170 | 0.001 | 1.143 | 0.013 |
| 198 | CML415   | 0.293 | 0.004 | 0.133 | 0.002 | 1.137 | 0.046 |
| 199 | CML116   | 0.133 | 0.002 | 0.090 | 0.003 | 1.307 | 0.011 |
| 200 | CIMBL114 | 0.131 | 0.003 | 0.090 | 0.005 | 1.305 | 0.016 |

|     |          |       |       |       |       |       |       |
|-----|----------|-------|-------|-------|-------|-------|-------|
| 201 | CIMBL145 | 0.128 | 0.002 | 0.097 | 0.002 | 1.290 | 0.007 |
| 202 | CML171   | 0.279 | 0.005 | 0.053 | 0.000 | 1.172 | 0.017 |
| 203 | CIMBL39  | 0.169 | 0.003 | 0.163 | 0.001 | 1.161 | 0.030 |
| 204 | CIMBL85  | 0.195 | 0.003 | 0.321 | 0.003 | 0.922 | 0.007 |
| 205 | CIMBL21  | 0.154 | 0.001 | 0.159 | 0.010 | 1.105 | 0.033 |
| 206 | CIMBL57  | 0.152 | 0.002 | 0.142 | 0.006 | 1.110 | 0.026 |
| 207 | CIMBL37  | 0.113 | 0.005 | 0.074 | 0.002 | 1.215 | 0.033 |
| 208 | CIMBL29  | 0.168 | 0.001 | 0.116 | 0.001 | 1.118 | 0.012 |
| 209 | CML304   | 0.116 | 0.003 | 0.079 | 0.004 | 1.200 | 0.023 |
| 210 | CIMBL46  | 0.079 | 0.002 | 0.082 | 0.001 | 1.231 | 0.016 |
| 211 | CIMBL1   | 0.206 | 0.003 | 0.144 | 0.002 | 1.033 | 0.008 |
| 212 | CIMBL112 | 0.174 | 0.001 | 0.093 | 0.002 | 1.098 | 0.011 |
| 213 | CIMBL72  | 0.152 | 0.003 | 0.135 | 0.001 | 1.071 | 0.017 |
| 214 | CIMBL140 | 0.219 | 0.004 | 0.165 | 0.002 | 0.960 | 0.021 |
| 215 | CML305   | 0.109 | 0.004 | 0.046 | 0.002 | 1.172 | 0.027 |
| 216 | CIMBL20  | 0.222 | 0.002 | 0.182 | 0.002 | 0.889 | 0.022 |
| 217 | CIMBL10  | 0.077 | 0.001 | 0.065 | 0.002 | 1.150 | 0.010 |
| 218 | CIMBL24  | 0.177 | 0.002 | 0.123 | 0.000 | 0.986 | 0.016 |
| 219 | CIMBL69  | 0.171 | 0.001 | 0.078 | 0.006 | 1.023 | 0.012 |
| 220 | P138     | 0.133 | 0.005 | 0.054 | 0.001 | 1.055 | 0.018 |
| 221 | CIMBL148 | 0.141 | 0.005 | 0.130 | 0.002 | 0.950 | 0.018 |
| 222 | CIMBL119 | 0.124 | 0.002 | 0.125 | 0.001 | 0.935 | 0.010 |
| 223 | CML28    | 0.137 | 0.002 | 0.132 | 0.003 | 0.907 | 0.012 |
| 224 | CIMBL137 | 0.175 | 0.001 | 0.121 | 0.001 | 0.870 | 0.012 |
| 225 | CIMBL155 | 0.107 | 0.003 | 0.083 | 0.001 | 0.972 | 0.010 |
| 226 | CIMBL8   | 0.052 | 0.002 | 0.052 | 0.001 | 1.014 | 0.002 |
| 227 | CIMBL132 | 0.147 | 0.002 | 0.125 | 0.001 | 0.845 | 0.013 |
| 228 | CML168   | 0.169 | 0.001 | 0.144 | 0.000 | 0.797 | 0.014 |
| 229 | CIMBL44  | 0.105 | 0.002 | 0.069 | 0.001 | 0.929 | 0.007 |
| 230 | CML122   | 0.130 | 0.002 | 0.086 | 0.001 | 0.888 | 0.010 |
| 231 | CIMBL126 | 0.195 | 0.003 | 0.144 | 0.001 | 0.740 | 0.015 |
| 232 | CML50    | 0.108 | 0.001 | 0.094 | 0.002 | 0.839 | 0.004 |
| 233 | CIMBL26  | 0.192 | 0.002 | 0.202 | 0.001 | 0.637 | 0.002 |
| 234 | CIMBL157 | 0.126 | 0.003 | 0.115 | 0.001 | 0.783 | 0.002 |

|     |          |       |       |       |       |       |       |
|-----|----------|-------|-------|-------|-------|-------|-------|
| 235 | CIMBL115 | 0.100 | 0.003 | 0.063 | 0.001 | 0.851 | 0.021 |
| 236 | CIMBL7   | 0.096 | 0.001 | 0.049 | 0.002 | 0.787 | 0.015 |
| 237 | CIMBL116 | 0.118 | 0.000 | 0.119 | 0.002 | 0.674 | 0.005 |
| 238 | CIMBL31  | 0.126 | 0.001 | 0.098 | 0.001 | 0.671 | 0.013 |
| 239 | CIMBL101 | 0.165 | 0.001 | 0.087 | 0.000 | 0.637 | 0.003 |
| 240 | CIMBL144 | 0.082 | 0.001 | 0.083 | 0.002 | 0.715 | 0.003 |
| 241 | CML121   | 0.086 | 0.001 | 0.109 | 0.001 | 0.682 | 0.002 |
| 242 | CIMBL5   | 0.115 | 0.001 | 0.076 | 0.003 | 0.656 | 0.010 |
| 243 | CIMBL92  | 0.104 | 0.003 | 0.079 | 0.001 | 0.656 | 0.011 |
| 244 | CML130   | 0.071 | 0.001 | 0.077 | 0.001 | 0.548 | 0.010 |

---



**Table S2.** The primer sequences for qRT-PCR

| No. | Name              | Primer sequences               |
|-----|-------------------|--------------------------------|
| 1.  | <i>ZmSCYL2</i> -F | 5'-AAACAGGCTGTGCTTCCTCGTGT-3'  |
| 2   | <i>ZmSCYL2</i> -R | 5'-GCCGAACCGTCTCCAAGATACCC-3'  |
| 3   | <i>ZmActin</i> -F | 5'-GGGATTGCCGATCGTATGAG-3'     |
| 4   | <i>ZmActin</i> -R | 5'-GAGCCACCGATCCAGACACT-3'     |
| 5   | <i>AtActin</i> -F | 5'-GGTGTCATGGTTGGTATGGGTC-3'   |
| 6   | <i>AtActin</i> -R | 5'-CCTCTGTGAGTAGAACTGGGTGC-3'  |
| 7   | <i>NtL25</i> -F   | 5'-CCCCTCACCACAGAGTCTGC-3'     |
| 8   | <i>NtL25</i> -R   | 5'-AAGGGTGTGTGTGTCCTCAATCTT-3' |

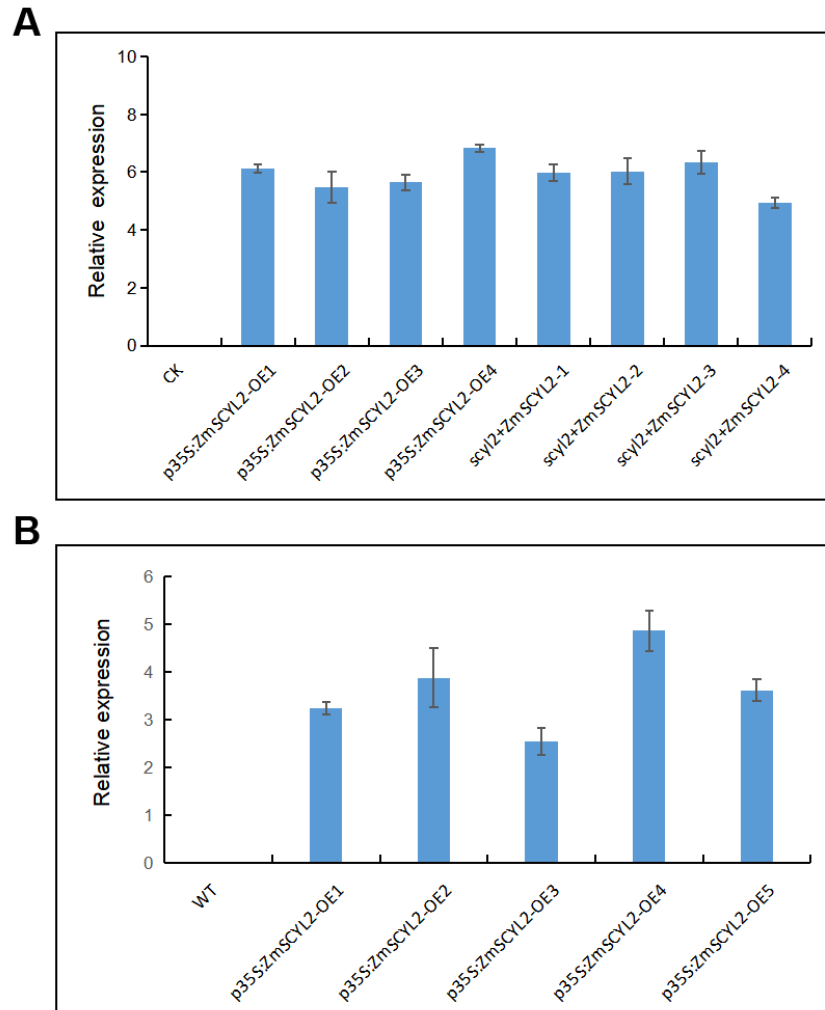

**Figure S1.** Relative expression levels of *ZmSCYL2* in transgenic plants. (A) Comparison the relative expression levels of *ZmSCYL2* in CK, *ZmSCYL2*-OE and *scyl2*+*ZmSCYL2* of *Arabidopsis*. (B) Comparison the relative expression levels of *ZmSCYL2* in WT and *ZmSCYL2*-OE of tobacco.
